# Supplementary material
Source: Springer Nature journal article supplement (https://www.springermedizin.de/resource/supplementary/12936_2012_2556_MOESM3_ESM.pdf/9543224)

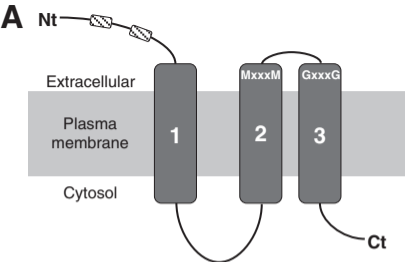

**B**

|    |                                                                       |     |
|----|-----------------------------------------------------------------------|-----|
| Hs | SFPHLLQT <u>V</u> LHIIQVVISYFIMLIEMTYNGYLCIAVAAGAGTGYFLFS-----WKKAVVV | 183 |
| Ms | SFPHLLQT <u>V</u> LHIIQVVISYFIMLIEMTYNGYLCIAVAAGAGTGYFLFS-----WKKAVVV | 189 |
| Tp | LLTHLFLFLIALCAYALDFLIMLVVMTFNVGVFFAVILGYSVGYVLSLAYSTLRTQPNR           | 531 |
| Cp | IKVICTNVLLTILYYFMHYLIMLIAMTFNWGLFFSVIIGLSIGYGFELGSITKNECSCN           | 169 |
| Pf | FKNNSYRMLLSFVIYSWDYLLMLIVMTFNVGLFVAVVVGLSFGFFIFGNKFVSSKKCSPD          | 218 |
| Pv | FKNNLTRSLLSFIIYSWDYLLMLIVMTFNVGLFFAVVVGLSIGFFLFGHKFVTCGKSSTD          | 339 |
| Py | FKNNTIRMILSFIIYSWDYLLMLIVMTFNVGLFFAVILGLSFGYFLMGGKFVTCNTSHS           | 259 |
| Pb | FKNNMIRMILSFIIYSWDYLLMLIVMTFNVGLFFAVILGLSFGYFLMGEKFVACTKSSKC          | 221 |
| Pc | FKHNTIRMILSFIIYSWDYLLMLIVMTFNVGLFFAVILGLSFGYFLMGNNFVSCQNSNC           | 196 |
| Pg | FKNNTIRMILAFIIYSWDYLVMLIVMTFNVGLFFSVIFGLAFGFFLFGSHFVTSKKCATT          | 199 |
| Pk | FKNNLTRSALSFIISWDYLLMLIVMTFNVGLFVAVVVGLSIGFFLFGHKFVTCGSNSTD           | 289 |
| Pr | FKNNSYRMLLSFVIYSWDYLLMLIVMTFNVGLFVAVVVGLSFGFFIFGNKFVSSKKCSPD          | 170 |
|    | : : : : * * : * * : : : * . * : :                                     |     |

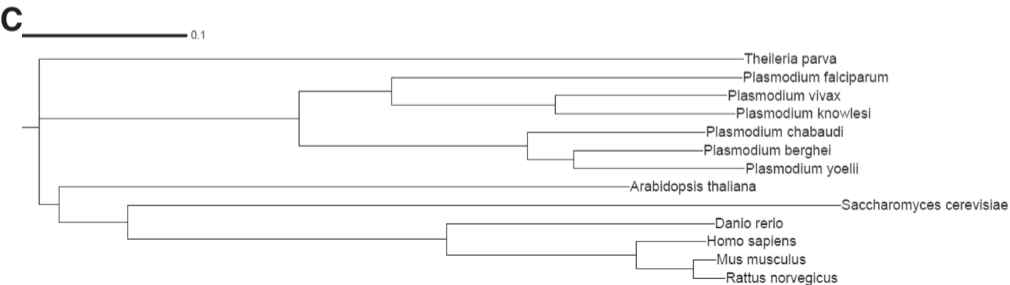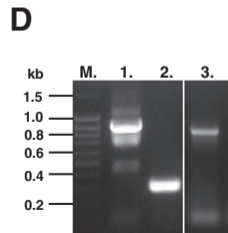

Supplement: MOESM3 [file 9543224]
